# Supplementary material for: End-to-end design of ingestible electronics
Source: Springer Nature journal article supplement (doi:10.1038/s41928-024-01122-2), 2024-02-09
Supplement: 41928_2024_1122_MOESM1_ESM.pdf [file 41928_2024_1122_MOESM1_ESM.pdf]

---

# End-to-end design of ingestible electronics

---

In the format provided by the  
authors and unedited

---

## Contents

|                                                                                   |     |
|-----------------------------------------------------------------------------------|-----|
| Supplementary Table 1: Summary of commercial and custom analog front end circuits | 2   |
| Supplementary Table 2: Summary of commercial and custom transceiver (TRX) modules | 3   |
| Supplementary Table 3: Summary of powering techniques                             | 4   |
| Supplementary Table 4: Summary of localization techniques for ingestibles         | 5   |
| References                                                                        | 6-7 |

## Tables

Supplementary Table 1. Summary of commercial and custom analog front end circuits.

| Modality        | Type       | Name/<br>Reference | DC Current<br>[ $\mu$ A]<br>(Sampling Rate) | ADC<br>Capabilities | Supply<br>Voltage<br>[V] | Total<br>Power<br>[ $\mu$ W] | Area<br>[ $\text{mm}^2$ ] |
|-----------------|------------|--------------------|---------------------------------------------|---------------------|--------------------------|------------------------------|---------------------------|
| Optical         | Commercial | AFE4404            | 600<br>(100 S/s)                            | 24-bit,<br>1 kS/s   | 2                        | 1200                         | $2.6 \times 1.6$          |
|                 | Commercial | MAX86141           | 80<br>(256 S/s)                             | 19-bit,<br>4096 S/s | 1.8                      | 144                          | $2.05 \times 1.85$        |
|                 | Custom     | [1]                | 117<br>(360 S/s)                            | 10-bit,<br>360 S/s  | 1.2                      | 140.4                        | $2 \times 2$              |
|                 | Custom     | [2]                | 9<br>(NR)                                   | 10-bit,<br>225 kS/s | 1.55                     | 13.95                        | $2 \times 1$              |
| Electrochemical | Commercial | NJU9101            | 250<br>(1 kS/s)                             | 16-bit,<br>2 kS/s   | 2.4                      | 600                          | $4 \times 4$              |
|                 | Commercial | AD5941             | 6000<br>(200 kS/s)                          | 16-bit,<br>1.6 MS/s | 2.8                      | 16800                        | $3.6 \times 4.2$          |
|                 | Custom     | [3]                | 2.5<br>(0.2 S/s)                            | 16-bit,<br>0.2 S/s  | 1.2                      | 3                            | 0.36                      |
|                 | Custom     | [4]                | 58<br>(1 kS/s)                              | 12-bit,<br>10 kS/s  | 1.8                      | 104.4                        | 0.47                      |
| Bioimpedance    | Commercial | ADS1192            | 280<br>(500 S/s)                            | 16-bit,<br>8 kS/s   | 2.7                      | 756                          | $5 \times 5$              |
|                 | Commercial | MAX30001G          | 150<br>(512 S/s)                            | 20-bit,<br>512 S/s  | 1.1                      | 165                          | $2.75 \times 2.95$        |
|                 | Custom     | [5]                | 36<br>(10 kS/s)                             | 9-bit,<br>1 MS/s    | 1.8                      | 64.8                         | 0.24                      |
|                 | Custom     | [6]                | 33<br>(128 kS/s)                            | 12-bit,<br>128 kS/s | 1.2                      | 39.6                         | 0.738                     |

NR - not reported

Supplementary Table 2. Summary of commercial and custom transceiver (TRX) modules.

| Modality   | Technology (Frequency) | Name/Reference | Modulation | TX/RX Data Rate [Mb/s]  | TX (output power)/RX DC Current [mA] | Supply Voltage [V] | TX/RX Energy Efficiency [nJ/bit] | Area [mm <sup>2</sup> ] | External Components |
|------------|------------------------|----------------|------------|-------------------------|--------------------------------------|--------------------|----------------------------------|-------------------------|---------------------|
| RF         | BLE & Zigbee (2.4 GHz) | nRF5340        | FSK/PSK    | 2                       | 3.2 (0dBm) /2.6                      | 1.8                | 2.7/2.2                          | 4.4×4.0                 | MN,ANT, XTAL        |
|            |                        | STM32WB        | FSK/PSK    | 2                       | 5.2 (0dBm) / 4.5                     | 1.8                | 4.4/3.8                          | 5.1×5.1                 | MN,ANT, XTAL        |
|            |                        | CC2650         | FSK/PSK    | 2                       | 6.1 (0dBm) /5.9                      | 1.8                | 5.5/5.3                          | 5.0×5.0                 | MN,ANT, XTAL        |
|            | BLE (2.4 GHz)          | MAX3266        | FSK        | 2                       | 4.3 (0dBm) /3.3                      | 1.8                | 3.7/2.8                          | 4.2×3.8                 | ANT, XTAL           |
|            |                        | QN908          | FSK        | 2                       | 3.5 (0dBm) /3.5                      | 1.8                | 2.8/2.8                          | 3.3×3.2                 | MN,ANT, XTAL        |
|            |                        | [7]            | FSK        | 1                       | 5.4 (0dBm) /2.3                      | 1                  | 5.4/2.3                          | 0.85                    | ANT, XTAL           |
|            |                        | [8]            | FSK        | 1                       | 3.7 (0dBm) /2.75                     | 1                  | 3.7/2.8                          | 1.9                     | ANT, XTAL           |
|            |                        | [9]            | FSK        | 1                       | 2.9 (-3dBm) /2.3                     | 1                  | 2.9/2.3                          | 1.64                    | ANT, XTAL           |
|            | MICS (400 MHz)         | ZL70102        | FSK        | 0.8                     | 5.3 (-3dBm) /4.3                     | 2.8                | 18.5/15                          | 4.3×3.2                 | MN,ANT, XTAL        |
|            |                        | [10]           | FSK        | 0.2                     | 3.1 (-6dBm) /1.5                     | 1                  | 15.5/7.5                         | 3.5×3.8                 | ANT                 |
|            |                        | [11]           | PSK        | 4.5                     | 2.3 (-10dBm) /2.2                    | 1                  | 0.6/0.5                          | 1.7×1.8                 | MN,ANT, XTAL        |
|            | ISM (915 MHz)          | [12]           | OOK        | 0.25                    | 0.135 (NR) /NR                       | 1.55               | 0.8/NR                           | 0.003                   | None                |
|            | ISM (915 MHz)          | [13]           | PPM        | 0.03 /0.06              | 0.05 (-27dBm) /1.55                  | 4                  | 2/29.6                           | 2.2×1.2                 | ANT                 |
|            | Backscatter            | [14]           | OOK        | 0.125 /NR               | 0.1 (NR) /NR                         | 1.8                | 1.4/NR                           | 7.5×12                  | ANT                 |
| Ultrasonic | Other                  | [15]           | OOK        | 0.1 /0.025              | 0.18 (NR) /NR                        | 1                  | 1.8/NR                           | 2.6×6.5                 | Piezo               |
| Magnetic   | Other                  | [12]           | OOK        | NR /2*10 <sup>-11</sup> | NR /0.175                            | 1.55               | NR /13*10 <sup>3</sup>           | 0.9×0.9                 | Magnetic Sensor     |

NR - not reported, MN - matching network, ANT - antenna, XTAL - crystal

**Supplementary Table 3.** Summary of powering techniques.

| Modality          | Type                            | Output Voltage | Size [mm <sup>2</sup> \ mm <sup>3</sup> ] | Capacity / Power  | Safety   |
|-------------------|---------------------------------|----------------|-------------------------------------------|-------------------|----------|
| Battery           | Li-ion <sup>[16,17]</sup>       | 3 V            | Ø 4.8×1.2<br>Ø 6.8×2.1                    | 1 mAh<br>5.5 mAh  | Low      |
|                   | Silver oxide <sup>[18,19]</sup> | 1.55 V         | Ø 4.8×1.6<br>Ø 6.8×2.8                    | 7.5 mAh<br>28 mAh | Moderate |
|                   | Solid-state <sup>[20]</sup>     | 1.5 V          | 4.4×3×1.1                                 | 100 µAh           | Moderate |
|                   | Transient <sup>[21]</sup>       | 2.5 V          | 8×10×0.3                                  | 0.6 µAh           | High     |
|                   | Flexible <sup>[22]</sup>        | 3.9 V          | 2.25×1.7×0.13                             | 5.6 µAh           | Moderate |
| Energy harvesting | Piezoelectric <sup>[23]</sup>   | 0.1 V          | 25×20×0.075                               | NR                | High     |
|                   | Triboelectric <sup>[24]</sup>   | 0.2 V          | 16×12×2.5                                 | 40 µW             | High     |
|                   | Galvanic <sup>[25]</sup>        | 0.15 V         | 3×10×0.25                                 | 7 µW              | High     |
| Power transfer    | Acoustic <sup>[15]</sup>        | 0.2 V          | 0.9×0.9×0.5                               | >200 µW           | Moderate |
|                   | RF <sup>[26]</sup>              | NR             | 6.8×6.8                                   | >120 µW           | Moderate |

NR - not reported

**Supplementary Table 4.** Summary of localization techniques for ingestibles.

| Modality      | Components in the pill                   | Components in the external station   | Pill components' power consumption | External station's power consumption     | Complexity | Accuracy                          |
|---------------|------------------------------------------|--------------------------------------|------------------------------------|------------------------------------------|------------|-----------------------------------|
| Imaging       | None                                     | MRI, CT, X-ray or ultrasound scanner | None                               | High (kW-level)                          | High       | High (hundreds of $\mu\text{m}$ ) |
| Environmental | pH, temperature and $\text{O}_2$ sensors | None                                 | Low ( $\mu\text{W}$ -level)        | None                                     | Low        | Low (organ-level)                 |
| RF            | RF transmitter                           | RF receiver                          | High (mW-level)                    | Moderate (mW-level)                      | High       | Low (few cm)                      |
| Ultrasound    | Ultrasonic transducer                    | Ultrasonic transducer                | Moderate (sub-mW)                  | Moderate (sub-mW)                        | Moderate   | High (sub-mm)                     |
| Magnetic I    | Permanent magnet                         | Magnetic sensors                     | None                               | Moderate (mW-level)                      | High       | Moderate (few mm)                 |
| Magnetic II   | Magnetic sensor                          | Permanent magnet or electromagnet    | Low ( $\mu\text{W}$ -level)        | Moderate / High (tens to hundreds of mW) | Moderate   | High (hundreds of $\mu\text{m}$ ) |

## References

- [1] Sonmezoglu, S. & Maharbiz, M. M. 34.4 a 4.5mm<sup>3</sup> deep-tissue ultrasonic implantable luminescence oxygen sensor. In *2020 IEEE International Solid-State Circuits Conference (ISSCC)*, 454–456 (2020).
- [2] Zhu, C., Wen, Y., Liu, T., Yang, H. & Sengupta, K. A packaged ingestible bio-pill with 15-pixel multiplexed fluorescence nucleic-acid sensor and bi-directional wireless interface for in-vivo bio-molecular sensing. In *2020 IEEE Symposium on VLSI Circuits*, 1–2 (2020).
- [3] Liao, Y.-T., Yao, H., Lingley, A., Parviz, B. & Otis, B. P. A 3- $\mu$ W cmos glucose sensor for wireless contact-lens tear glucose monitoring. *IEEE Journal of Solid-State Circuits* **47**, 335–344 (2012).
- [4] Xie, C., Ma, Y., Tang, Z. & Zhang, M. Design of a 68 db input dynamic range potentiostat for electrochemical biosensing. In *2021 6th International Conference on Integrated Circuits and Microsystems (ICICM)*, 426–429 (2021).
- [5] Bai, W., Zhu, Z., Li, Y. & Liu, L. A 64.8 $\mu$ W > 2.2 g $\Omega$  dc–ac configurable cmos front-end ic for wearable ecg monitoring. *IEEE Sensors Journal* **18**, 3400–3409 (2018).
- [6] Ha, H. *et al.* 22.5 a bio-impedance readout ic with digital-assisted baseline cancellation for 2-electrode measurement. In *2019 IEEE International Solid-State Circuits Conference (ISSCC)*, 368–370 (2019).
- [7] Sun, Z. *et al.* A 0.85mm<sup>2</sup> ble transceiver with embedded t/r switch, 2.6mw fully-passive harmonic suppressed transmitter and 2.3mw hybrid-loop receiver. In *ESSCIRC 2018 - IEEE 44th European Solid State Circuits Conference (ESSCIRC)*, 310–313 (2018).
- [8] Kuo, F.-W. *et al.* A bluetooth low-energy transceiver with 3.7-mw all-digital transmitter, 2.75-mw high-if discrete-time receiver, and tx/rx switchable on-chip matching network. *IEEE Journal of Solid-State Circuits* **52**, 1144–1162 (2017).
- [9] Liu, H. *et al.* An adpll-centric bluetooth low-energy transceiver with 2.3 mw interference-tolerant hybrid-loop receiver and 2.9 mw single-point polar transmitter in 65nm cmos. In *2018 IEEE International Solid-State Circuits Conference (ISSCC)*, 444–446 (2018).
- [10] Song, M. *et al.* A millimeter-scale crystal-less mics transceiver for insertable smart pills. *IEEE Transactions on Biomedical Circuits and Systems* **14**, 1218–1229 (2020).
- [11] Ba, A. *et al.* A 0.33 nj/bit ieee802. 15.6/proprietary mics/ism wireless transceiver with scalable data rate for medical implantable applications. *IEEE Journal of Biomedical and Health Informatics* **19**, 920–929 (2015).
- [12] Abdigazy, A. & Monge, M. A bimodal low-power transceiver featuring a ring oscillator-based transmitter and magnetic field-based receiver for insertable smart pills. *IEEE Solid-State Circuits Letters* **5**, 154–157 (2022).
- [13] Chuo, L.-X. *et al.* 7.4 a 915mhz asymmetric radio using q-enhanced amplifier for a fully integrated 3 $\times$ 3 $\times$ 3mm<sup>3</sup> wireless sensor node with 20m non-line-of-sight communication. In *2017 IEEE International Solid-State Circuits Conference (ISSCC)*, 132–133 (2017).
- [14] Lazaro, M., Lazaro, A. & Villarino, R. Long-range lorawan backscatter based sensors for medical and wearable applications. In *2021 51st European Microwave Conference (EuMC)*, 777–780 (2022).
- [15] Chang, T. C., Wang, M. L., Charthad, J., Weber, M. J. & Arbabian, A. 27.7 a 30.5mm<sup>3</sup> fully packaged implantable device with duplex ultrasonic data and power links achieving 95kb/s with lt;104 ber at 8.5cm depth. In *2017 IEEE International Solid-State Circuits Conference (ISSCC)*, 460–461 (2017).
- [16] Ms412fe seiko instruments coin cell battery. <https://www.sii.co.jp/en/me/datasheets/ms-rechargeable/ms412fe-5/>. Accessed: 2022-10-10.
- [17] Ms621fe seiko instruments coin cell battery. <https://www.sii.co.jp/en/me/datasheets/ms-rechargeable/ms621fe/>. Accessed: 2022-10-10.
- [18] Sr416sw seiko instruments coin cell battery. <https://www.sii.co.jp/en/me/battery/products/silver-oxide/>. Accessed: 2022-10-10.
- [19] Sr626 murata electronics coin cell battery. <https://www.murata.com/en-us/products/productdetail?partno=SR626>. Accessed: 2022-10-10.
- [20] Ceracharge® tdk solid-state battery. <https://product.tdk.com/en/products/solid-state-batt/index.html>. Accessed: 2022-10-10.
- [21] Chen, Y. *et al.* Physical-chemical hybrid transiency: A fully transient li-ion battery based on insoluble active materials. *Journal of Polymer Science Part B: Polymer Physics* **54**, 2021–2027 (2016).

- [22] Kutbee, A. T. *et al.* Flexible and biocompatible high-performance solid-state micro-battery for implantable orthodontic system. *npj flexible electronics* **1**, 1–8 (2017).
- [23] Dagdeviren, C. *et al.* Flexible piezoelectric devices for gastrointestinal motility sensing. *Nature Biomedical Engineering* **1**, 807–817 (2017).
- [24] Yao, G. *et al.* Effective weight control via an implanted self-powered vagus nerve stimulation device. *Nature communications* **9**, 1–10 (2018).
- [25] Nadeau, P. *et al.* Prolonged energy harvesting for ingestible devices. *Nature biomedical engineering* **1**, 1–8 (2017).
- [26] Abid, A. *et al.* Wireless power transfer to millimeter-sized gastrointestinal electronics validated in a swine model. *Scientific reports* **7**, 1–6 (2017).
